# Supplementary material for: Tartary Buckwheat (Fagopyrum tataricum) NAC Transcription Factors FtNAC16 Negatively Regulates of Pod Cracking and Salinity Tolerant in Arabidopsis
Source: MDPI journal article supplement (doi:10.3390/ijms22063197), 2021-03-21
Supplement: s1 [file s1]

Supplementary Table S3. q-PCR Primers used in this study

| Gene Name       | Gene No.  | Sequences (5' to 3') |                          |
|-----------------|-----------|----------------------|--------------------------|
| <i>PAL1</i>     | At2g37040 | Forward              | CAGGATCAAGGAATGTAGGTCG   |
|                 |           | Reverse              | AAATCGCCGTGAAAACCTTG     |
| <i>PAL2</i>     | At3g53260 | Forward              | CGTAGACCAGTCGTGAATCTTG   |
|                 |           | Reverse              | TCTCCATAACCCAATCACTGC    |
| <i>PAL3</i>     | At5g04230 | Forward              | AGCGGTTAATGAGGTTGTGAG    |
|                 |           | Reverse              | TTAAAGGGTTAGTGAGGCTGC    |
| <i>C4H</i>      | At2g30490 | Forward              | CGGATCTAACAAAGGAAGTGCTC  |
|                 |           | Reverse              | CCAATGCTCGCCGTAAACAG     |
| <i>CCoAOMT1</i> | At4g34050 | Forward              | CTGGCTATGGATGTCAACAGAG   |
|                 |           | Reverse              | ATCAAGAACGGGAAGAGCAG     |
| <i>4CL1</i>     | At1g51680 | Forward              | TGCCTAATCAACGGACCAAC     |
|                 |           | Reverse              | AATTCGGGACAGTTTGGGAG     |
| <i>4CL2</i>     | At3g21240 | Forward              | CTATGGGATGACAGAAGCAGG    |
|                 |           | Reverse              | GTATCTTCATCTCGGCGTTCC    |
| <i>CAD5</i>     | At4g34230 | Forward              | AATCTGCCACACCGATCTTC     |
|                 |           | Reverse              | AACCAACTCCAACATATGTCCC   |
| <i>CAD6</i>     | At4g37970 | Forward              | CAAATGAAGGCTGCAATGGG     |
|                 |           | Reverse              | ACCGAGTAGAACAAGTTTACCG   |
| <i>CCR1</i>     | At2g02400 | Forward              | TAGGCTTAGAGTTCACTTCCACCA |
|                 |           | Reverse              | CCACGGATTCTTGCGATGC      |
| <i>CCR2</i>     | At2g33600 | Forward              | CGGCGGCTACATTGCTTCT      |
|                 |           | Reverse              | TGAGTCTTTCCTTGGCTCCTTG   |
| <i>PRX52</i>    | At5g05340 | Forward              | CTTCTACTCAACCTCTTGCCC    |
|                 |           | Reverse              | CCGTTGACAAAGCAATCGTG     |
| <i>F5H</i>      | At4g36220 | Forward              | GGAGGAACGGAAACGGTAGC     |
|                 |           | Reverse              | CTTCGGCGAGTTCTTGTTGG     |

|               |           |         |                           |
|---------------|-----------|---------|---------------------------|
| <i>COMT1</i>  | At5g54160 | Forward | CAAGCCTCTCAACCAAACAAG     |
|               |           | Reverse | TGCCTCAAACCTCTTTCTCGG     |
| <i>sAPX</i>   | At4g08390 | Forward | TCCTCCTTCACCTGCTACTCATC   |
|               |           | Reverse | CCAACCACTACGTTCTGGCCTA    |
| <i>Actin2</i> | At3g18780 | Forward | GTATGAGCAAAGAAATCACAGCACT |
|               |           | Reverse | CTGAGGGAAGCAAGAATGGAAC    |
| <i>ABI2</i>   | At5g57050 | Forward | TGACGGAGGAGATAGTGAAGGAG   |
|               |           | Reverse | CCACCGAGGTAGACCCAACAGT    |
| <i>HKT1;1</i> | At4g10310 | Forward | TCAACGTCCTTAACATCACTCTCG  |
|               |           | Reverse | GACTCCATCGTCCTGCAAACC     |
| <i>SOS1</i>   | At2g01980 | Forward | CGGCAGCATGGTTAATGTGTAC    |
|               |           | Reverse | TTGGCTGAAACGAGACCTTGA     |

---

| Gene Name      | Gene No.            | Sequences (5' to 3') |                         |
|----------------|---------------------|----------------------|-------------------------|
| <i>FtNAC16</i> | FtPinG0000381200.01 | Forward              | AGCTTCAACCGCGAACTGG     |
|                |                     | Reverse              | GACTCACCGTATGCTCCTCTGG  |
| <i>FtActin</i> | FtPinG0002124000.01 | Forward              | GGAAGTATAGCGTCTGGATTGGC |
|                |                     | Reverse              | CACTTGCGGTGAACGATTGC    |

---
