# Supplementary material for: Tartary Buckwheat (Fagopyrum tataricum) NAC Transcription Factors FtNAC16 Negatively Regulates of Pod Cracking and Salinity Tolerant in Arabidopsis
Source: MDPI journal article supplement (doi:10.3390/ijms22063197), 2021-03-21
Supplement: s1 [file s1]

Supplementary Table S1. Homologous protein alignment sequence

| Name                | Gene ID                 | Sequence                                                                                                                                                                                                                                                                                                                                                                                                        |
|---------------------|-------------------------|-----------------------------------------------------------------------------------------------------------------------------------------------------------------------------------------------------------------------------------------------------------------------------------------------------------------------------------------------------------------------------------------------------------------|
| AtNST1<br>(ANAC043) | AT2G46770               | MNLSVNGQSQVPPGFRFHPTEEEELLHYYLKKKVANQKI<br>DLDVDIQDIDLNKLEPWDIQEKCKIGSTPQNDWYFFSHKD<br>KKYPTGTRTNRATTAGFWKATGRDKAICGSSRRIGMRK<br>TLVFYKGRAPHGEKSDWIMHEYRLDDNIHELNVSNLSG<br>DRDLGGDEGWVVCrvFRKKNYVKALHNPTNNRNSTH<br>MMIRSKKHELDQDGFMHLPQLDSPSTNGVHEPIQQMNQ<br>DGSDSMFNYEDDHNQEAPNSTVNWVELDRLVAYQLNG<br>QASEASESTTNHLSCFNNHHLNHDSITPFCLIPAGDYDR<br>SNNNDRTTTATATTFQDLLRSQSSRVFDNDSIDDFWSF<br>TKQSSSPSSLDPISHFSV   |
| AtNST2              | AT3G61910               | MNISVNGQSQVPPGFRFHPTEEEELLKYYLRKKISNIKIDL<br>DVIPDIDLNKLEPWDIQEMCKIGTTPQNDWYFYSHKDK<br>KYPTGTRTNRATTVGFWKATGRDKTIYTNGDRIGMRKT<br>LVFYKGRAPHGQKSDWIMHEYRLDESVLISSCGDHDVN<br>VETCDVIGSDEGWVVCrvFKKNNLCKNMISSSPASSVK<br>TPSFNEETIEQLLEVMGQCKGEIVLDPFLKLPNLECHNN<br>TTITSYQWLIDDQVNNCHVSKVMDPSFITSWAALDRLV<br>ASQLNGPNSYSIPAVNETSQSPYHGLNRSGCNTGLTPDY<br>YIPEIDLWNEADFARTTCHLLNGSG                                  |
| AtNST3              | AT1G32770               | MADNKVNLSINGQSKVPPGFRFHPTEEEELLHYYLRRKKV<br>NSQKIDLDVIREVDLNKLEPWDIQEECRIGSTPQNDWYF<br>FSHKDKKYPTGTRTNRATVAGFWKATGRDKIICSCVRRI<br>GLRKTTLVFYKGRAPHGQKSDWIMHEYRLDDTPMSNGY<br>ADVVTEDPMSYNEEGWVVCrvFRKKNYQKIDDCPKITL<br>SSLPDDTEEEKGPTFHNTQNV TGLDHVLLYMDRTGSNIC<br>MPESQTTTQHQQDDVLFMQLPSLET PKSESPVDQSFLT<br>KLD FSPVQEKITERPVCSNWASLDRLVAWQLNNGHNP<br>CHRKS FDEEEENGDTMMQRWDLHWNNDNDVDLWSSF<br>TESSSSLDPLLHLSV |
| FtNAC16             | FtPinG00003<br>81200.01 | MNLSVNGQSQVPPGFRFHPTEEEELLHYYLKKKVANQKI<br>DLDVDIQDIDLNKLEPWDIQEKCKIGSTPQNDWYFFSHKD<br>KKYPTGTRTNRATTAGFWKATGRDKAICGSSRRIGMRK<br>TLVFYKGRAPHGEKSDWIMHEYRLDDNIHELNVSNLSG<br>DRDLGGDEGWVVCrvFRKKNYVKALHNPTNNRNSTH<br>MMIRSKKHELDQDGFMHLPQLDSPSTNGVHEPIQQMNQ<br>DGSDSMFNYEDDHNQEAPNSTVNWVELDRLVAYQLNG<br>QASEASESTTNHLSCFNNHHLNHDSITPFCLIPAGDYDR<br>SNNNDRTTTATATTFQDLLRSQSSRVFDNDSIDDFWSF<br>TKQSSSPSSLDPISHFSV   |
| GaNAC43             | XP_0176296              | MPENMSISVNGQSQVPPGFRFHPTEEEELLQYYLRKKVSY                                                                                                                                                                                                                                                                                                                                                                        |

---

|         |            |                                                                                                                                                                                                                                                                                                                                                                                    |
|---------|------------|------------------------------------------------------------------------------------------------------------------------------------------------------------------------------------------------------------------------------------------------------------------------------------------------------------------------------------------------------------------------------------|
|         | 05.1       | EKIDLDVIRDVDLNKLEPWDIQESCKIGTTPQNDWYFFS<br>HKDKKYPTGTRTNRATAAGFWKATGRDKVIYSNCRRIG<br>MRKTLVIFYKGRAPHGQKSDWIMHEYRLDDNIVETTVSN<br>AMGEGTQEEGWVVCRIFKKKNNHHKTLDPNSSLGSES<br>RNHMLSACNEGELEQILEHMRRNCNEEGVANNSWRLM<br>RPIETAISNSYPDSFMKLPSLESPNSTSSQNCYQPMIVDNE<br>GSITNQMSGDPNSRLTNWAALDRLVASQLNGQTETSRQ<br>LACFNDHSISMGYSNPSADHHHHDLQSPALRYNRSYNG<br>TQDYNSEMDLWSLTRSSSSSDPLCHVVNASV |
| SmNAC43 | QBZ39066.1 | SQVPPGFRFHPTEEEELLQYYLKKKVASEKIDLDVIQDVD<br>LNKLEPWDIQEKCTIGSTPQNDWYFFSHKDKKYPTGTRT<br>NRATASGFWKATGRDKVIYGNSRRIGMRKTLVIFYKGRA<br>PRGQKSDWIMHEYRLDDNTTANITHTTNNHGSNAMGEG<br>MQEEGWVVCRVFKKKNHSHKTLDTTPIISSSWMLSTIN<br>SCKEGTLEQMLQSIGTPFRRNHFPDSDNNTRFLTLSNLH<br>DSPNSSSRTQNCYQSLHVQ                                                                                               |

---
