# Supplementary material for: Tartary Buckwheat (Fagopyrum tataricum) NAC Transcription Factors FtNAC16 Negatively Regulates of Pod Cracking and Salinity Tolerant in Arabidopsis
Source: MDPI journal article supplement (doi:10.3390/ijms22063197), 2021-03-21
Supplement: s1 [file s1]

Supplementary Table S2. Data of evolution tree

| Name    | Group name | Gene ID                 | Sequence                                                                                                                                                                                                                                                                                                                                                                                                               |
|---------|------------|-------------------------|------------------------------------------------------------------------------------------------------------------------------------------------------------------------------------------------------------------------------------------------------------------------------------------------------------------------------------------------------------------------------------------------------------------------|
| FtNAC16 | OSNAC7     | FtPinG00003<br>81200.01 | MNLSVNGQSQVPPGFRFHPTEEEELLHYLYLK<br>KKVANQKIDLDVIQDIDLNKLEPWDIQEKCK<br>IGSTPQNDWYFFSHKDKKYPTGTRTNRATTA<br>GFWKATGRDKAICGSSRRIGMRKTLVIFYKG<br>RAPHGEKSDWIMHEYRLDDNIHELNVSNLS<br>GDRDLGGDEGWVVCRVFRKKNYVKALHNP<br>TNNRNSTHMMIRSKKHELDQDGFMHLPQL<br>DSPSTNGVHEPIQQMNQDGSDSMFNYEDDH<br>NQEAPNSTVNWVELDRLVAYQLNGQASEAS<br>ESTTNHLSCFNNHHLNHDSITPFCLIPAGDY<br>DRSNNNDRTTTATATTFQDLLRSQSSRVFDN<br>DSIDDFWSFTKQSSSPSSLDPISHFSV |
| AtNST1  | OSNAC7     | AT2G46770               | MMSKSMSISVNGQSQVPPGFRFHPTEEEELLQ<br>YYLRKKVNSIEIDLVDVIRVDLNKLEPWDIQ<br>EMCKIGTTPQNDWYFFSHKDKKYPTGTRTN<br>RATAAGFWKATGRDKIISNGRRIGMRKTLV<br>FYKGRAPHGQKSDWIMHEYRLDDNIISPED<br>VTVHEVVSIIGEASQDEGWVVCRIFFKKNL<br>HKTLNSPVGGASLSGGDTPKTTSSQIFNED<br>TLDQFLELMGRSCKEELNLDPFMKLPNLESP<br>NSQAINNCHVSSPDTNHNIHVSINVDTSFVT<br>SWAALDRLVASQLNGPTSYSITAVNESHVGH<br>DHLALPSVRSPYPSLNRASYSYHAGLTQEYTP<br>EMELWNTTSSLSPPGFCHVSNGSG |
| AtNST2  | OSNAC7     | AT3G61910               | MNISVNGQSQVPPGFRFHPTEEEELLKYLYLRK<br>KISNIKIDLDVIPDIDLNKLEPWDIQEMCKIG<br>TTPQNDWYFYSHKDKKYPTGTRTNRATTVG<br>FWKATGRDKTIYTNGDRIGMRKTLVIFYKGR<br>APHGQKSDWIMHEYRLDESVLISSCGDHDV<br>NVETCDVIGSDEGWVVCRVFKKNNLCKNMI<br>SSSPASSVKTPSFNEETIEQLLEVMGQCKGE<br>IVLDPFLKLPNLECHNNTTITSYQWLIDDQV<br>NNCHVSKVMDPSFITSWAALDRLVASQLNG<br>PNSYSISPAVNETSQSPYHGLNRSGCNTGLTPD<br>YYIPEIDLWNEADFARTTCHLLNGSG                              |
| AtNST3  | OSNAC7     | AT1G32770               | MADNKVNLSINGQSKVPPGFRFHPTEEEELLH<br>YYLRKKVNSQKIDLDVIREVDLNKLEPWDI<br>QEECRIGSTPQNDWYFFSHKDKKYPTGTRT<br>NRATVAGFWKATGRDKIICSCVRRIGLRKTL<br>VIFYKGRAPHGQKSDWIMHEYRLDDTPMSN<br>GYADVVTEDPMSYNEEGWVVCRVFRKKNY                                                                                                                                                                                                             |

---

|        |        |             |                                                                                                                                                                                                                                                                                                                                                                                                                                        |
|--------|--------|-------------|----------------------------------------------------------------------------------------------------------------------------------------------------------------------------------------------------------------------------------------------------------------------------------------------------------------------------------------------------------------------------------------------------------------------------------------|
|        |        |             | QKIDDCPKITLSSLPDDTEEEKGPTFHNTQN<br>VTGLDHVLLYMDRTGSNICMPESQTTTQHQ<br>DDVLFMQLPSLETPKSESPVDQSFLTSPKLD<br>SPVQEKITERPVCSNWASLDRLVAWQLNNG<br>HHNPCHRKSFDEEEEENGDTMMQRWDLHW<br>NNDDNVDLWSSFTESSSSLDPLLHLSV                                                                                                                                                                                                                                 |
| AtVND1 | OSNAC7 | AT2G18060   | MEPMESCSVPPGFRFHPTDEELVGYYLRKKI<br>ASQKIDLDVIRIDIDLYRIEPWDLQEQRIGYE<br>EQNEWYFFSHKDKKYPTGTRTNRATMAGF<br>WKATGRDKAVYDKTKLIGMRKTLVIFYKGR<br>APNGKKSDWIMHEYRLESDENAPPQEEGW<br>VVCRAFKKRATGQAKNTETWSSSYFYDEVA<br>PNGVNSVMDPIDYISKQQHNIFGKGLMCKQ<br>ELEGMVDGINYIQSNQFIQLPQLQSPSLPLM<br>KRPSSSMSITSMDNNYNYKLPLADEESFESFI<br>RGEDRRKKKKQVMGTGNWRELDKFVASQL<br>MSQEDNGTSSFAGHHIVNEDKNNNDVEMDS<br>SMFLSEREEENRFVSEFLSTNSDYDIGICVFD<br>N         |
| AtVND2 | OSNAC7 | AT4G36160.1 | MESVDQSCSVPPGFRFHPTDEELVGYYLRK<br>KVASQKIDLDVIRIDIDLYRIEPWDLQESCRIG<br>YEERNEWYFFSHKDKKYPTGTRTNRATMA<br>GFWKATGRDKAVYDKSKLIGMRKTLVIFYK<br>GRAPNGQKTDWIMHEYRLESDENAPPQEEG<br>WVVCRAFKKKPMTGQAKNTETWSSSYFYD<br>ELPSGVRVTEPLNYVSKQKQNVFAQDLMF<br>KQELEGSDIGLNFHCDQFIQLPQLESPLPLT<br>KRPVSLTSITSLEKNKNYKRHLIEEDVSFNA<br>LISSGNKDKKKKTSVMTTDWRALDKFVAS<br>QLMSQEDGVSGFGGHHEEDNNKIGHYNNE<br>ESNNKGSVETASSTLLSDREEENRFISGLLCS<br>NLDYDLYRDLHV |
| AtVND3 | OSNAC7 | AT5G66300   | MMKVDQDYSCSIPPGRFHPTDEELVGYYL<br>KKKIASQRIDLDVIREIDLYKIEPWDLQERCR<br>IGYEEQTEWYFFSHRDKKYPTGTRTNRATVA<br>GFWKATGRDKAVYLNKSLIGMRKTLVIFYRG<br>RAPNGQKSDWIIHEYYSLESHQNSPPQEEG<br>WVVCRAFKKRRTTIPTKRRQLWDPNCLFYDD<br>ATLLEPLDKRARHNPDTATPFKQELLSEAS<br>HVQDGDGFSMYLQCIDDDQFSQLPQLESPL<br>PSEITPHSTTFSENSSRKDDMSSEKRITDWR<br>YLDKFVASQFLMSGED                                                                                                |
| AtVND4 | OSNAC7 | AT1G12260   | MNSFSHVPPGFRFHPTDEELVDYYLRKKVAS<br>KRIEIDFIKDIDLYKIEPWDLQELCKIGHEEQS                                                                                                                                                                                                                                                                                                                                                                   |

---

|        |        |           |                                                                                                                                                                                                                                                                                                                                                                                                                                                          |
|--------|--------|-----------|----------------------------------------------------------------------------------------------------------------------------------------------------------------------------------------------------------------------------------------------------------------------------------------------------------------------------------------------------------------------------------------------------------------------------------------------------------|
|        |        |           | DWYFFSHKDKKYPTGTRTNRATKAGFWKA<br>TGRDKAIYLRHSLIGMRKTLVIFYKGRAPNG<br>QKSDWIMHEYRLETDENGTPQEEGWVVCRA<br>VFKKRLAAVRRMGDYDSSPSHWYDDQLSF<br>MASELETNGQRRILPNHHQQQHEHQHQM<br>PYGLNASAYALNNPNLQCKQELELHYNHLV<br>QRNHLLDESHLSFLQLPQLESPKIQQDNSNC<br>NSLPYGTSNIDNNSSHANLQQSNIAHEEQL<br>NQGNQNFSSLYMNSGNEQVMDQVTDWRVL<br>DKFVASQLSNEEAATASASIQNNAKDTSNAE<br>YQVDEEKDPKRASDMGEEYTASTSSSCQIDL<br>WK                                                                  |
| AtVND5 | OSNAC7 | AT1G62700 | MNSFSQVPPGFRFHPTDEELVDYYLRKKVAS<br>KRIEIDIKDVDLYKIEPCDLQELCKIGNEEQS<br>EWYFFSHKDKKYPTGTRTNRATKAGFWKAT<br>GRDKAIYIRHSLIGMRKTLVIFYKGRAPNGQK<br>SDWIMHEYRLETSENGTPQEEGWVVCRAVFK<br>KKLAATVRKMGDYHSSPSQHWYDDQLSFM<br>ASEIISSSPRQFLPNHHYNRHHHQQTLP CGL<br>NAFNNNPNLQCKQELELHYNQMVQHQQQ<br>NHLRESMFLQLPQLESPTSNCNSDNNNT<br>RNISNLQSSNISHEEQLQQGNQSFSSLYYD<br>QGVEQMTTDWRVLDKFVASQLSNDEEAAA<br>VVSSSSHQNNVKIDTRNTGYHVIDEGINLPE<br>NDSERVVEMGEEYSNAHAASTSSSCQIDL |
| AtVND6 | OSNAC7 | AT5G62380 | MESLAHIPPGYRFHPTDEELVDYYLKNKVA<br>PGMQVDVIKDVDLYKIEPWDIQELCGRGTG<br>EEREWYFFSHKDKKYPTGTRTNRATGSGFW<br>KATGRDKAIYSKQELVGMKTLVIFYKGRAP<br>NGQKSDWIMHEYRLETDENGPPHEEGWVV<br>CRAFKKKLTMNYYNNPRTMMGSSSGQESN<br>WFTQQMDVGNGNYHLPDLES PRMFQSS<br>SSSLSSLHQNDQDPYGVVLSTINATPTTIMQR<br>DDGHVITNDDDHMMIMNTSTGDHHQSGLL<br>VNDDHNDQVMDWQTLDFVASQLIMSQEE<br>EEVNKDPSDNSSNETFHHLSEEQAATMVSM<br>NASSSSSPCSFYSWAQNTH                                                     |
| AtVND7 | OSNAC7 | AT1G71930 | MDNIMQSSMPPGFRFHPTTEEELVGYLDRKI<br>NSMKSALDVIVEIDLYKMEPWDIQARCKLG<br>YEEQNEWYFFSHKDRKYPTGTRTNRATAAG<br>FWKATGRDKAVLSKNSVIGMRKTLVYYKGR<br>APNGRKS DWIMHEYRLQNSE LAPVQEEGW<br>VVCRAFRKPIPQRPLGYEPWQNQLYHVES<br>SNYSSSVTMTNTSHHIGASSSSHNLNQMLM                                                                                                                                                                                                              |

|              |        |           |                                                                                                                                                                                                                                                                                                                                                                                                                                                                                              |
|--------------|--------|-----------|----------------------------------------------------------------------------------------------------------------------------------------------------------------------------------------------------------------------------------------------------------------------------------------------------------------------------------------------------------------------------------------------------------------------------------------------------------------------------------------------|
|              |        |           | <p>SNNHYNPNNTSSSMHQYGNIELPQLDSPSL</p> <p>PSLGTNKDQNESFEQEEKSFNCVDWRTLD</p> <p>TLLETQVIHPNPNILMFETQSYNPAPSFPSM</p> <p>HQSYNEVEANIHSLGCFPDS</p>                                                                                                                                                                                                                                                                                                                                                |
| AtSMB        | OSNAC7 | AT1G79580 | <p>MEIGSSSTVAGGGQLSVPPGFRFHPTEEEELLY</p> <p>YYLKKKVSYPEIDLVDVIREVDLNKLEPWEL</p> <p>KEKCRIGSGPQNEWYFFSHKDKKYPTGTRT</p> <p>NRATAAGFWKATGRDKSIHLNSSKKIGLRKT</p> <p>LVFYTGRAPHGQKTEWIMHEYRLDDSENEI</p> <p>QEDGWVVCRVFKKKNHFRGFHQEQEQDHH</p> <p>HHHQYISTNNDHDDHHHIDSNSNNHSPLILH</p> <p>PLDHHHHHHHIGRQIHMLHEFANTLSHGS</p> <p>MHLPQLFSPDSAAAAAAAAAASAQPFVSPINT</p> <p>TDIECSQNLLRLTSNNNYGGDWSFLDKLLTT</p> <p>GNMNQQQQQQVQNHQAKCFGDLSNNDNN</p> <p>DQADHLGNNNGGSSSSPVNQRFPFHYLGND</p> <p>ANLLKFPK</p> |
| AtNAC07<br>0 | OSNAC7 | AT4G10350 | <p>MGSSSNGGVPPGFRFHPTDEELLHYLKKKI</p> <p>SYQKFEMEVIKVDLNKLEPDLQERCKIG</p> <p>STPQNEWYFFSHKDRKYPTGSRTNRATHAG</p> <p>FWKATGRDKCIRNSYKKIGMRKTLVFKGR</p> <p>APHGQKTDWIMHEYRLEDADDPQANPSED</p> <p>GWVVCVRFMKNLKFVVNEGSSSINSLDQH</p> <p>NHDASNNNHALQARSFMHRDSPYQLVRNH</p> <p>GAMTFELNKPDALHQYPPIFHKPPSLGFDY</p> <p>SSGLARDESAASEGLQYQQACEPGLDVGT</p> <p>CETVASHNHQQGLGEWAMMDRLVTCHMG</p> <p>NEDSSRGITYEDGNNNSSSVVQVPATNQLT</p> <p>LRSEMDFWGYSK</p>                                                 |
| NAC015       | OSNAC7 | AT1G33280 | <p>MSSSNGGVPPGFRFHPTDEELLHYLKKKIS</p> <p>YEKFEMEVIKVDLNKIEPDLQDRCKIGST</p> <p>PQNEWYFFSHKDRKYPTGSRTNRATHSGFW</p> <p>KATGRDKCIRNSYKKIGMRKTLVFKGRAP</p> <p>HGQKTDWIMHEYRIEDTEDDPCEDGWVVC</p> <p>RVFKKKNLKFVGNDVGSNISNNRLEARSFIR</p> <p>RESPYQGISMFELNKPEEISVHQYPQPPMFQP</p> <p>HHKPLSIGYDYSALLPRESEYQQACQPSGV</p> <p>EVGTCKAVSEWGIVNCNMVSHEDSSRAMRF</p> <p>EDDGNNTSSTVQPPSNLLSLRGENGFLGLF</p>                                                                                                  |
| NAC1         | NAC1   | AT1G56010 | <p>METEEEMKESSISMVEAKLPPGFRFHPKDDE</p> <p>LVCDYLMRRSLHNNHRPPLVLIQVDLNKCEP</p> <p>WDIPKMACVGGKDWFYFSQRDRKYATGLR</p> <p>TNRATATGYWKATGKDRTILRKGLVGMRK</p> <p>TLVFIYQGRAPRGRKTDWVMHEFRLQGS</p>                                                                                                                                                                                                                                                                                                  |

|        |         |           |                                                                                                                                                                                                                                                                                                                                                                                                             |
|--------|---------|-----------|-------------------------------------------------------------------------------------------------------------------------------------------------------------------------------------------------------------------------------------------------------------------------------------------------------------------------------------------------------------------------------------------------------------|
|        |         |           | PPNHSLSPPKEDWVLCRVFHKNTEGVICRDN<br>MGSCFDEITASASLPPLMDPYINFDAQEPSSYLS<br>DDHHYIINEHVPCFSNLSQNQTLNSNLNSV<br>SELKIPCKNPPLFTGGSASATLTGLDSFCSS<br>DQMVLRALLSQLTKIDGSLGPKESQSYGEGS<br>SESLLDIGIPSTVWNC                                                                                                                                                                                                           |
| NAC074 | NAC1    | AT4G28530 | MGLKDIGSKLPPGFRFHPSDEELVCHYLCNK<br>IRAKSDHGDVDDDDDDVDEALKGSTDLVEI<br>DLHICEPWELPDVAKLNAKEWYFFSFRDRK<br>YATGYRTNRATVSGYWKATGKDRTVMDPRT<br>RQLVGMRKTLVFYRNRAPNGIKTTWIMHEF<br>RLECPNIPPKEDWVLCRVFNKGRDSSLQDN<br>NYYNNDNQTQRLEVNDAPDLNYYNQLPPL<br>LSSPPHNHQHEKMKIQVCDQWEQLMKQPS<br>RTTGHPYHHHCHHQTACGWEQMMIGSLSS<br>PSSHGPDHESLLNLLYVDNNSVNIISGDHHQ<br>NYEKILLSSLDMTSLDHDKTCMGSSSDGGM<br>VSDLHMECGGLSFETENILAFQ |
| NAC096 | ANAC011 | AT5G46590 | MGSSCLPPGFRFHPTDEELIEYYLKRKVEGL<br>EIELEVIPVIDLYSFDPWELPDKSFLPNRDME<br>WYFFCSRDKKYPNGFRTNRGKAGYWKAT<br>GKDRKITSRSSSIIGYRKTLVFYKGRAPLGDR<br>SNWIMHEYRLCDDDTSQGSQNLKGAFVLCR<br>VAMKNEIKTNTKIRKIPSEQTIGSGESSGLSSR<br>VTSPSRDETMPFHSFANPVSTETDSSNIWISP<br>EFILDSSKDYPQIQDVASQCFQQDFDFPIGN<br>QNMEFPASTSLDQNMDEFMQNGYWTNYGY<br>DQTGLFGYSDFS                                                                      |
| NAC071 | ANAC011 | AT4G17980 | MGSSCLPPGFRFHPTDEELIGYYLSRKIEGLE<br>EIELEVIPVIDLYKFDPWELPGKSFLPNRDLEW<br>FFFCPRDKKYANGSRTNRATKAGYWKATGK<br>DRKITCKSSHVIAGYRKTLVFYEGRAPLGDR<br>TNWFMHEYRLCDIDDHSQKSPNFKGAFALC<br>RVVKKNELKKNSKSLKNKNEQDIGSCYSSL<br>ATSPCRDEASQIQSFKPSSTTNDSSSIWISPDFI<br>LDSSKDYPQIKEVASECFPNYHFPVTTANHH<br>VEFPLQEMLVRS                                                                                                     |
| NAC011 | ANAC011 | AT1G32510 | MVGSFLPPGFRFYPTDEELVGYYLHRRNEGL<br>EIELEIPLMDLYKFDPWELPEKSFLPNRDME<br>WFFFCHRDYQNGSRINRATKSGYWKATG<br>KDRKIVCHSSSSSSSSSITGCRKTLVFYMGRA<br>PFGGRTEWVMHEYRLFDNDTSQGSNFKGD<br>FALCRVIKRNEHTLKKCEIISPEVDESLSNN<br>VNNFCQASDLEKGCSDASNTRLSSPDFILESS                                                                                                                                                              |

---

|        |         |           |                                                                                                                                                                                                                                                                                                                                                      |
|--------|---------|-----------|------------------------------------------------------------------------------------------------------------------------------------------------------------------------------------------------------------------------------------------------------------------------------------------------------------------------------------------------------|
|        |         |           | FQGN SHSKTEEDSGFQVFTLPEFEYPLEVFA<br>DLNFDLEMEDPFMF DYHPEPHMNNEVMSH<br>HIRG                                                                                                                                                                                                                                                                           |
| NAC020 | ANAC011 | AT1G54330 | MAPMSLPPGFRFHPTDEELVAYYLDRKVNG<br>QAIELEI IPEVDLYKCEP WDLPEKSFLPGNDM<br>EWYFYSTRDKKYPNGSRTNRATRAGYWKA<br>TGKDRTVESKKMKMG MKKTLVYYRGRAPH<br>GLRTNWVMHEYRLTHAPSSSLKESYALCRV<br>FKKNIQIPKRKGEEEEAE EESTSVGKEEEEEK<br>EKKWRKCDGNYIEDESLKRASAETSSSELTQ<br>GVLLDEANSSSIFALHFSSSLDDHDHLFSNY<br>SHQLPYHPPLQLQDFPQLSMNEAEIMSIQQD<br>FQCRDSMNGTLDEIFSSSATFPASL |

---
