# Supplementary material for: Tartary Buckwheat (Fagopyrum tataricum) NAC Transcription Factors FtNAC16 Negatively Regulates of Pod Cracking and Salinity Tolerant in Arabidopsis
Source: Int J Mol Sci. 2021 Mar 21;22(6):3197. doi: 10.3390/ijms22063197 (PMC8061773; doi:10.3390/ijms22063197)
Supplement: Supplementary file 1 [file ijms-22-03197-s001.zip]

Archive with 8 entries (8 files):
- Supplementary Figure.1.tif
- Supplementary Figure.2.tif
- Supplementary Figure.3.tif
- Supplementary Figure.4.tif
- Supplementary Table S1. Alignment sequence.pdf
- Supplementary Table S2. Data of evolution tree.pdf
- Supplementary Table S3. q-PCR Primers.pdf
- Supporting Information.pdf
